# Supplementary material for: Interaction of dicoordinate phosphorus with boranes: chemistry of 3a,6a-diaza-1,4-diphosphapentalene as masked phosphinidene
Source: Royal Society of Chemistry journal article supplement (doi:10.1039/d1dt00747e), 2021-01-01

## Supporting Information

# **Interaction of Dicoordinate Phosphorus with Boranes: Chemistry of 3a,6a-Diaza-1,4-diphosphapentalene as Masked Phosphinidene**

Yulia S. Panova,<sup>[a]</sup> Alexandra V. Khristolyubova<sup>[a]</sup>, Natalia V. Zolotareva,<sup>[a]</sup> Vyacheslav V. Sushev,<sup>[a]</sup>  
Vadim E. Galperin,<sup>[a]</sup> Roman V. Romyantsev,<sup>[a]</sup> Georgy K. Fukin,<sup>[a]</sup> and Alexander N. Kornev<sup>\*[a]</sup>

*G. A. Razuvaev Institute of Organometallic Chemistry, Russian Academy of Sciences, 49 Tropinin str., 603137 Nizhny  
Novgorod, Russia*

## Table of Contents

|                                                                                                                                                                    |   |
|--------------------------------------------------------------------------------------------------------------------------------------------------------------------|---|
| <b>Table S1.</b> The crystal data and structures refinement details for <b>14</b> , <b>16</b> , <b>17</b> , <b>18</b> . .....                                      | 3 |
| <b>Table S2.</b> The main topological parameters for the selected bonds and interatomic interactions in <b>16</b> .....                                            | 4 |
| <b>Figure S1.</b> Fragment of crystal packing <b>14</b> along the crystallographic <i>c</i> ( <b>a</b> ) and <i>b</i> ( <b>b</b> ) axes. ....                      | 5 |
| <b>Figure S2.</b> «Dimeric» motif ( <b>a</b> ) and fragment of crystal packing <b>16</b> along the crystallographic <i>a</i> axis ( <b>b</b> ).....                | 5 |
| <b>Figure S3.</b> B3LYP/6-31G(d,p) optimized equilibrium geometries of <b>16</b> . .....                                                                           | 6 |
| <b>Figure S4.</b> UB3LYP/6-31G(d,p) optimized equilibrium geometries of anion radical <b>16</b> <sup>-•</sup> . .....                                              | 6 |
| <b>Figure S5.</b> Fragment of crystal packing <b>17</b> along the crystallographic <i>a</i> axis.....                                                              | 7 |
| <b>Scheme S1.</b> B3LYP/6-31G(d) optimized equilibrium geometries of <b>19</b> and <b>20</b> and related intermediates with their total and relative energies..... | 7 |
| <b>Scheme S2.</b> Spontaneous dehydrocoupling in peri-substituted phosphine–borane adducts.....                                                                    | 8 |
| <b>NMR spectra</b> .....                                                                                                                                           | 8 |

**Table S1.** The crystal data and structures refinement details for complexes **14**, **16**, **17**, and **18**.

| Complex                                                         | <b>14</b>                                                                                    | <b>16</b>                                                                      | <b>17</b>                                                                                                                   | <b>18</b>                                                                    |
|-----------------------------------------------------------------|----------------------------------------------------------------------------------------------|--------------------------------------------------------------------------------|-----------------------------------------------------------------------------------------------------------------------------|------------------------------------------------------------------------------|
| Empirical formula                                               | C <sub>24</sub> H <sub>26</sub> B <sub>2</sub> Cl <sub>4</sub> N <sub>2</sub> P <sub>2</sub> | C <sub>39</sub> H <sub>25</sub> BF <sub>15</sub> N <sub>2</sub> P <sub>2</sub> | C <sub>30</sub> H <sub>18</sub> BClF <sub>15</sub> N <sub>2</sub> OP <sub>2</sub><br>(0.5 CH <sub>2</sub> Cl <sub>2</sub> ) | C <sub>24</sub> H <sub>42</sub> B <sub>4</sub> N <sub>4</sub> P <sub>4</sub> |
| Formula Weight                                                  | 567.83                                                                                       | 879.36                                                                         | 822.68                                                                                                                      | 553.73                                                                       |
| Crystal System                                                  | Orthorhombic                                                                                 | Monoclinic                                                                     | Triclinic                                                                                                                   | Monoclinic                                                                   |
| Space Group                                                     | <i>Pna2(1)</i>                                                                               | <i>P2(1)/n</i>                                                                 | <i>P-1</i>                                                                                                                  | <i>P2(1)/c</i>                                                               |
| <i>a</i> , Å                                                    | 17.2276(5)                                                                                   | 9.8192(4)                                                                      | 9.3112(4)                                                                                                                   | 13.6969(5)                                                                   |
| <i>b</i> , Å                                                    | 11.6430(3)                                                                                   | 13.9606(6)                                                                     | 11.7738(5)                                                                                                                  | 12.2887(4)                                                                   |
| <i>c</i> , Å                                                    | 12.7160(4)                                                                                   | 26.3145(10)                                                                    | 16.1431(6)                                                                                                                  | 18.2101(6)                                                                   |
| $\alpha$ , °                                                    | 90                                                                                           | 90                                                                             | 97.5990(10)                                                                                                                 | 90                                                                           |
| $\beta$ , °                                                     | 90                                                                                           | 95.7722(16)                                                                    | 100.6420(10)                                                                                                                | 110.0090(10)                                                                 |
| $\gamma$ , °                                                    | 90                                                                                           | 90                                                                             | 110.4190(10)                                                                                                                | 90                                                                           |
| <i>V</i> , Å <sup>3</sup>                                       | 2550.59(13)                                                                                  | 3589.0(3)                                                                      | 1592.42(11)                                                                                                                 | 2880.06(17)                                                                  |
| <i>Z</i>                                                        | 4                                                                                            | 4                                                                              | 2                                                                                                                           | 4                                                                            |
| <i>d</i> <sub>calc</sub> , Mg/m <sup>3</sup>                    | 1.479                                                                                        | 1.627                                                                          | 1.716                                                                                                                       | 1.277                                                                        |
| $\mu$ , mm <sup>-1</sup>                                        | 0.608                                                                                        | 0.234                                                                          | 0.341                                                                                                                       | 0.284                                                                        |
| <i>F</i> <sub>000</sub>                                         | 1168                                                                                         | 1772                                                                           | 822                                                                                                                         | 1176                                                                         |
| Crystal Size, mm                                                | 0.300 x 0.100 x 0.100                                                                        | 0.100 x 0.070 x 0.030                                                          | 0.315 x 0.287 x 0.054                                                                                                       | 0.340 x 0.210 x 0.130                                                        |
| $\theta$ Range for Data Collection, °                           | 2.111 - 28.742                                                                               | 2.133 - 26.021                                                                 | 2.058 - 27.999                                                                                                              | 2.291 - 28.997                                                               |
| Index Ranges                                                    | -23 ≤ <i>h</i> ≤ 23<br>-11 ≤ <i>k</i> ≤ 15<br>-17 ≤ <i>l</i> ≤ 16                            | -12 ≤ <i>h</i> ≤ 12<br>-17 ≤ <i>k</i> ≤ 17<br>-32 ≤ <i>l</i> ≤ 32              | -12 ≤ <i>h</i> ≤ 12<br>-15 ≤ <i>k</i> ≤ 15<br>-21 ≤ <i>l</i> ≤ 21                                                           | -14 ≤ <i>h</i> ≤ 18<br>-16 ≤ <i>k</i> ≤ 16<br>-24 ≤ <i>l</i> ≤ 21            |
| Reflns Collected / unique                                       | 26774 / 6456                                                                                 | 39748 / 6948                                                                   | 20336 / 7606                                                                                                                | 28496 / 7616                                                                 |
| <i>R</i> <sub>int</sub>                                         | 0.0305                                                                                       | 0.0669                                                                         | 0.0342                                                                                                                      | 0.0432                                                                       |
| Completeness to $\theta$ , %                                    | 99.8                                                                                         | 98.8                                                                           | 99.7                                                                                                                        | 99.6                                                                         |
| Data / restraints / parameters                                  | 6456 / 567 / 351                                                                             | 6948 / 93 / 576                                                                | 7606 / 40 / 522                                                                                                             | 7616 / 30 / 384                                                              |
| <i>S</i> ( <i>F</i> <sup>2</sup> )                              | 1.047                                                                                        | 1.073                                                                          | 1.050                                                                                                                       | 1.032                                                                        |
| Final <i>R</i> Indices<br>( <i>I</i> > 2 $\sigma$ ( <i>I</i> )) | <i>R</i> <sub>1</sub> = 0.0588<br><i>wR</i> <sub>2</sub> = 0.1304                            | <i>R</i> <sub>1</sub> = 0.0807<br><i>wR</i> <sub>2</sub> = 0.1470              | <i>R</i> <sub>1</sub> = 0.0467<br><i>wR</i> <sub>2</sub> = 0.0960                                                           | <i>R</i> <sub>1</sub> = 0.0520<br><i>wR</i> <sub>2</sub> = 0.1193            |
| <i>R</i> Indices<br>(all data)                                  | <i>R</i> <sub>1</sub> = 0.0636<br><i>wR</i> <sub>2</sub> = 0.1326                            | <i>R</i> <sub>1</sub> = 0.1188<br><i>wR</i> <sub>2</sub> = 0.1601              | <i>R</i> <sub>1</sub> = 0.0650<br><i>wR</i> <sub>2</sub> = 0.1012                                                           | <i>R</i> <sub>1</sub> = 0.0783<br><i>wR</i> <sub>2</sub> = 0.1280            |
| Largest Diff. Peak and Hole, e/Å <sup>3</sup>                   | 0.566 / -0.632                                                                               | 0.730 / -0.510                                                                 | 0.501 / -0.625                                                                                                              | 0.711 / -0.429                                                               |

**Table S2.** The main topological parameters for the selected bonds and interatomic interactions in **16**.

| Bond          | $\rho(r)$ , a.e. | $\square^2\rho(r)$ , a.e. | $v(r)$ , a.e. | $h_e(r)$ , a.e. | $ E_{EML} ^*$ , Kcal/mol |
|---------------|------------------|---------------------------|---------------|-----------------|--------------------------|
| P(1)-N(1)     | 0.127            | 0.188                     | -0.244        | -0.099          | 76.7                     |
| P(2)-N(2)     | 0.148            | 0.384                     | -0.331        | -0.117          | 103.8                    |
| N(1)-N(2)     | 0.344            | -0.550                    | -0.490        | -0.314          | 153.6                    |
| B(1)-P(1)     | 0.089            | -0.119                    | -0.066        | -0.048          | 20.6                     |
| P(1)-C(1)     | 0.160            | -0.121                    | -0.271        | -0.151          | 85.2                     |
| N(2)-C(2)     | 0.274            | -0.482                    | -0.554        | -0.337          | 173.7                    |
| C(1)-C(2)     | 0.327            | -0.984                    | -0.518        | -0.382          | 162.6                    |
| C(8)-N(1)     | 0.304            | -0.491                    | -0.683        | -0.403          | 214.2                    |
| C(7)-P(2)     | 0.175            | 0.050                     | -0.346        | -0.167          | 108.6                    |
| C(8)-C(7)     | 0.306            | -0.894                    | -0.445        | -0.334          | 139.7                    |
| C(25)-B(1)    | 0.151            | -0.103                    | -0.242        | -0.134          | 76.0                     |
| C(13)-B(1)    | 0.146            | -0.105                    | -0.229        | -0.128          | 71.9                     |
| C(19)-B(1)    | 0.146            | -0.107                    | -0.229        | -0.128          | 72.0                     |
| F(1)···P(1)   | 0.018            | 0.063                     | -0.012        | 0.002           | 3.9                      |
| F(6)···P(1)   | 0.013            | 0.048                     | -0.009        | 0.002           | 2.8                      |
| F(6)···F(1)   | 0.006            | 0.026                     | -0.005        | 0.001           | 1.5                      |
| F(10)···F(5)  | 0.008            | 0.036                     | -0.006        | 0.002           | 1.9                      |
| F(10)···F(15) | 0.011            | 0.059                     | -0.009        | 0.003           | 2.7                      |
| F(11)···H(6A) | 0.008            | 0.030                     | -0.005        | 0.001           | 1.6                      |
| F(15)···H(9B) | 0.008            | 0.034                     | -0.005        | 0.002           | 1.6                      |
| F(1)···H(6B)  | 0.009            | 0.037                     | -0.006        | 0.002           | 1.8                      |
| F(15)···C(8)  | 0.008            | 0.033                     | -0.005        | 0.001           | 1.7                      |
| C(19)···F(15) | 0.010            | 0.044                     | -0.007        | 0.002           | 2.1                      |
| F(10)···C(30) | 0.011            | 0.051                     | -0.008        | 0.002           | 2.5                      |
| C(13)···F(11) | 0.012            | 0.051                     | -0.008        | 0.002           | 2.7                      |
| C(19)···H(9B) | 0.004            | 0.014                     | -0.002        | 0.001           | 0.5                      |

\* Espinosa–Molins–Lecomte (EML) correlation [E. Espinosa, E. Molins, C. Lecomte, *Chem. Phys. Lett.* 1998, 285, 170–173].

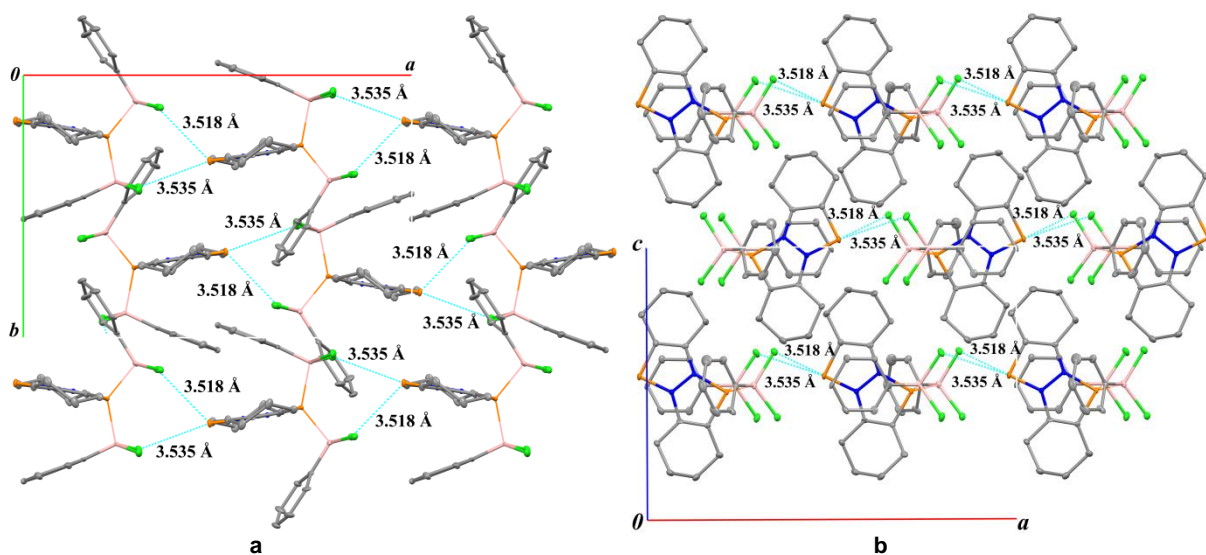

**Figure S1.** Fragment of crystal packing **14** along the crystallographic *c* (a) and *b* (b) axes. Hydrogen atoms are omitted for clarity.

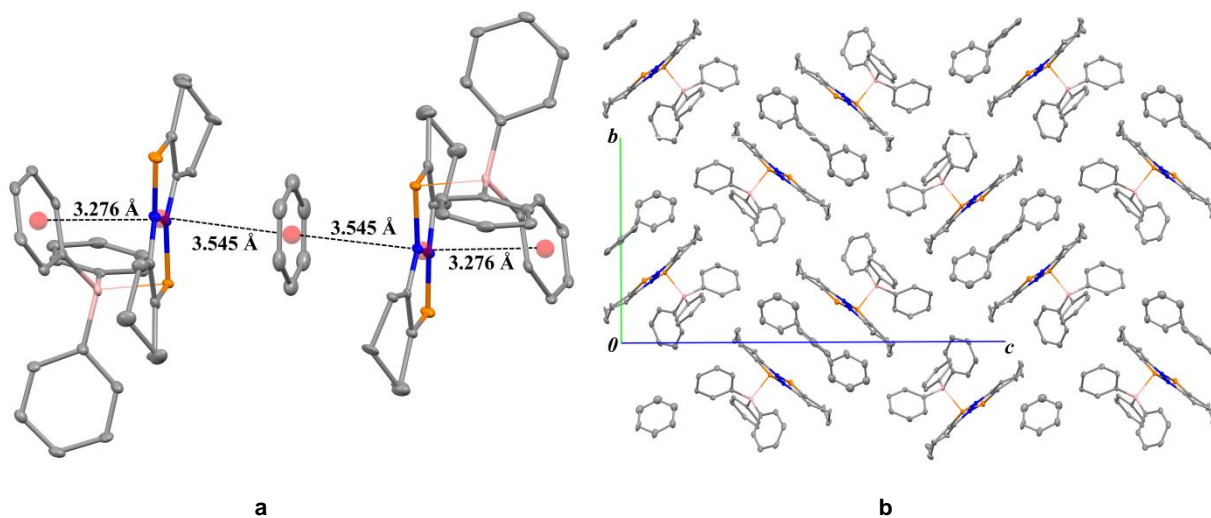

**Figure S2.** «Dimeric» motif (a) and the fragment of crystal packing **16** along the crystallographic *a* axis (b). Hydrogen and fluorine atoms are omitted for clarity. Red spheres indicate the centers of the phenyl rings and the centers of N-N bonds.

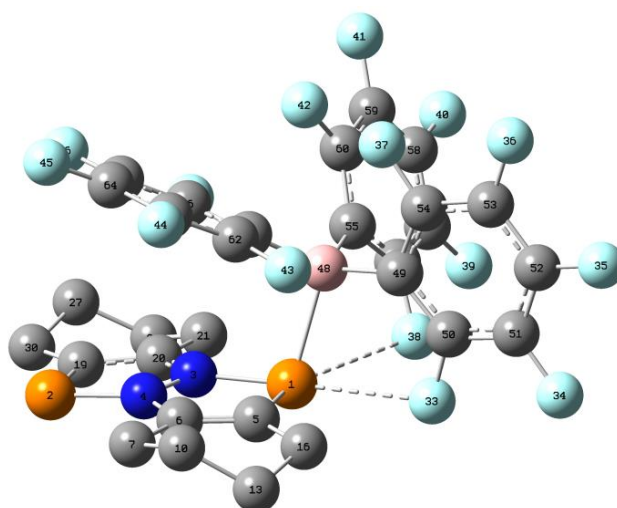

**Figure S3.** B3LYP/6-31G(d,p) optimized equilibrium geometries of **16**. Selected bond lengths [Å]: P(1)–B(48) 2.175, P(1)–F(33) 2.654, P(1)–F(38) 2.916, P(1)–N(3) 1.813, P(2)–N(4) 1.726, P(1)–C(5) 1.817, P(2)–C(19) 1.750.

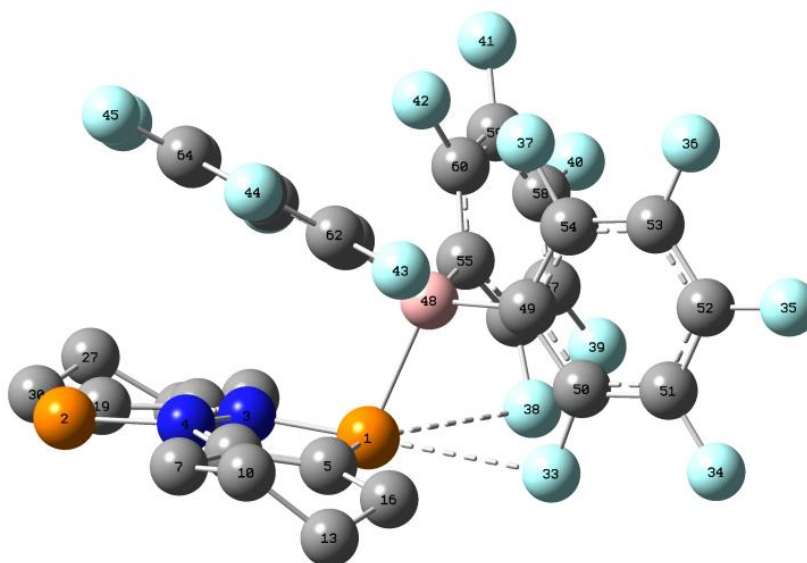

**Figure S4.** UB3LYP/6-31G(d,p) optimized equilibrium geometries of anion radical **16<sup>•-</sup>**. Selected bond lengths [Å]: P(1)–B(48) 2.147, P(1)–F(33) 2.775, P(1)–F(38) 3.004, P(1)–N(3) 1.791, P(2)–N(4) 1.774, P(1)–C(5) 1.830, P(2)–C(19) 1.792.

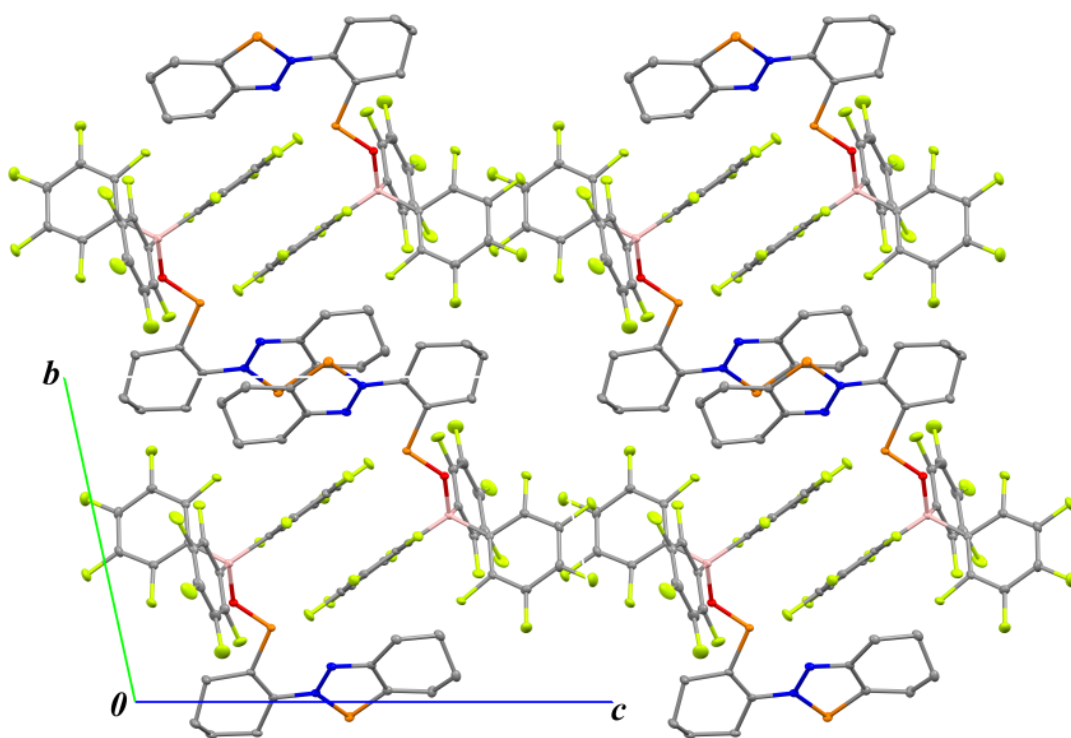

**Figure S5.** Fragment of crystal packing **17** along the crystallographic *a* axis. Hydrogen atoms and  $\text{CH}_2\text{Cl}_2$  molecules are omitted for clarity.

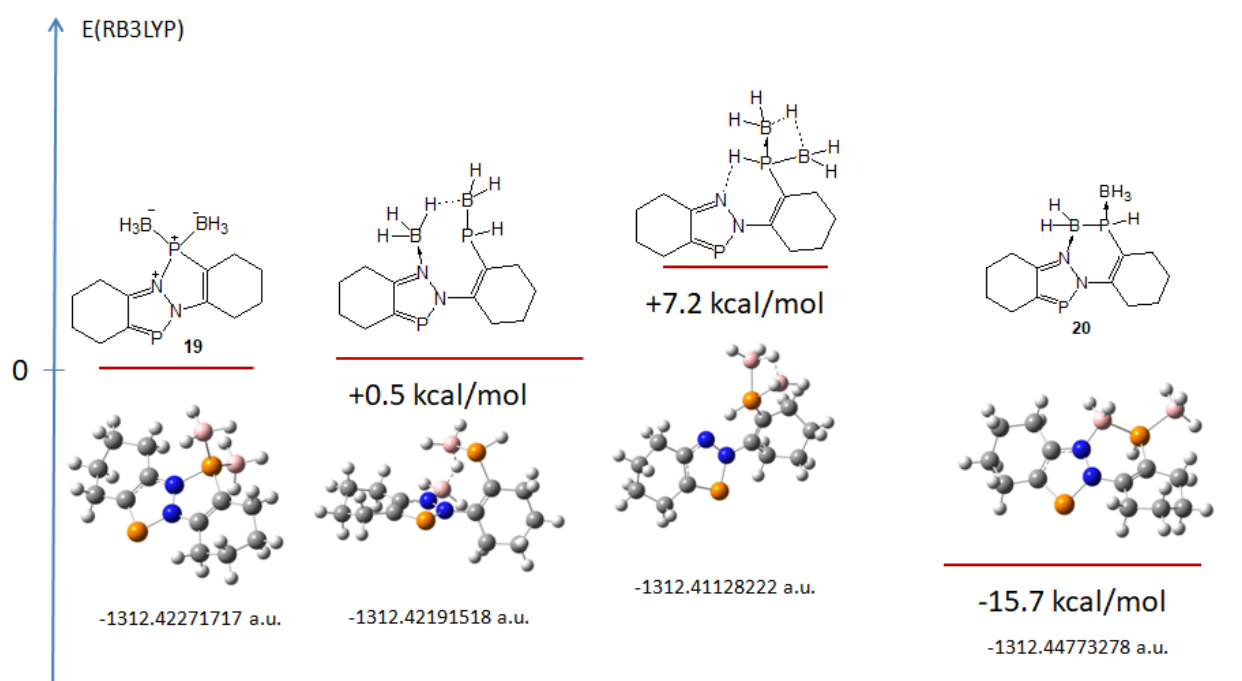

**Scheme S1.** B3LYP/6-31G(d) optimized equilibrium geometries of **19** and **20** and related intermediates with their total and relative energies.

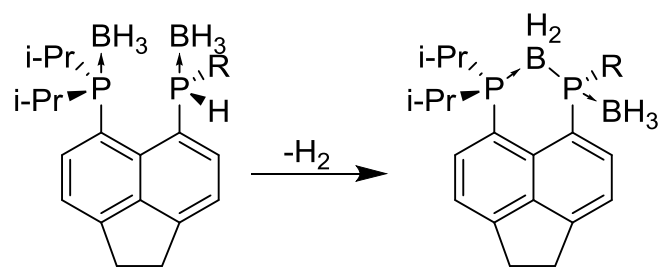

R = Ph, Fc, H

**Scheme S2.** Spontaneous dehydrocoupling in peri-substituted phosphine–borane adducts from ref. [L.J. Taylor, *Dalton Trans.* **2016**, 45, 1976. DOI: 10.1039/c5dt02539g].

### NMR spectra

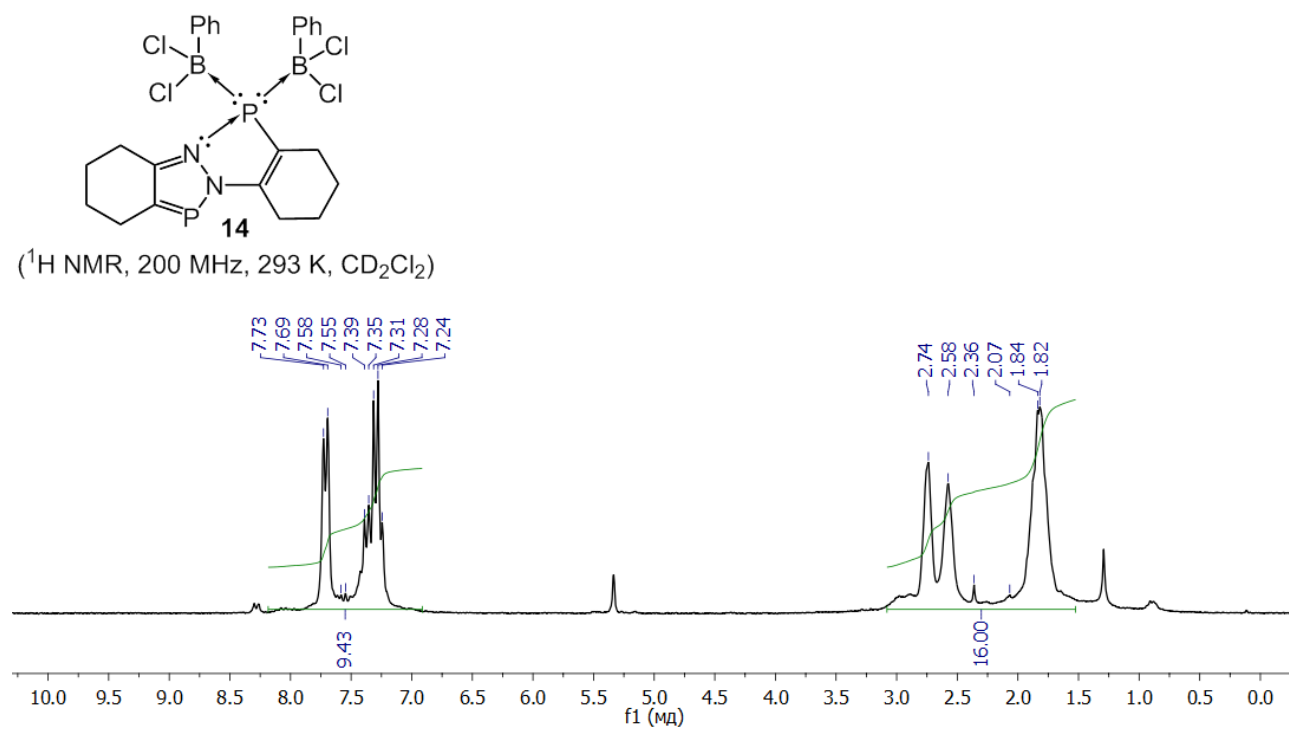



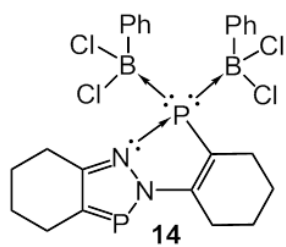

( $^1\text{H}$  NMR, 400 MHz, 243 K,  $\text{CD}_2\text{Cl}_2$ )

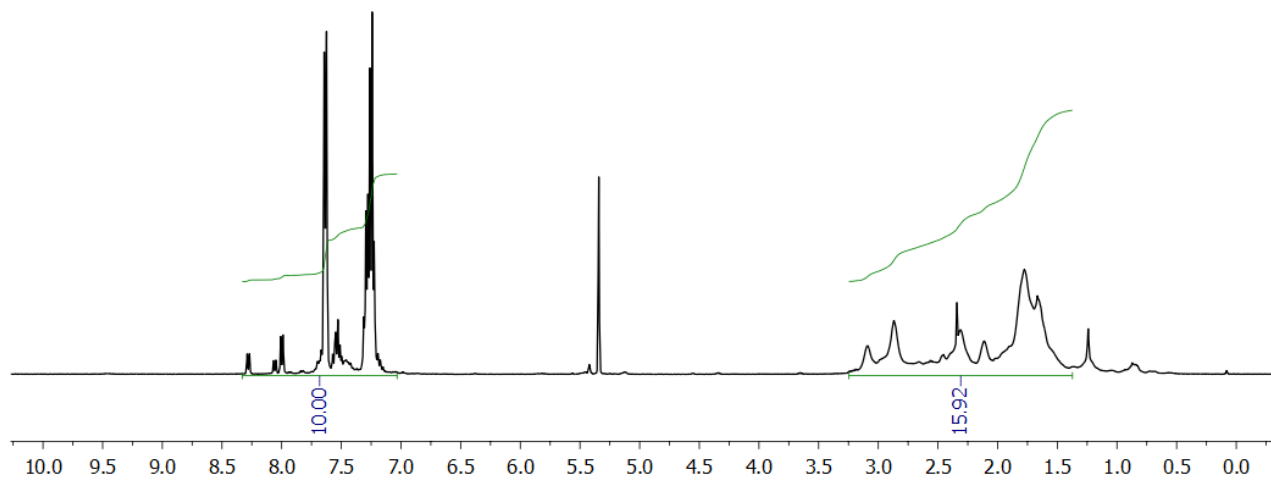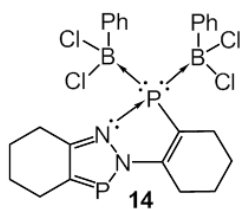

( $^{31}\text{P}\{^1\text{H}\}$  NMR, 162 MHz, 293 K,  $\text{CD}_2\text{Cl}_2$ )

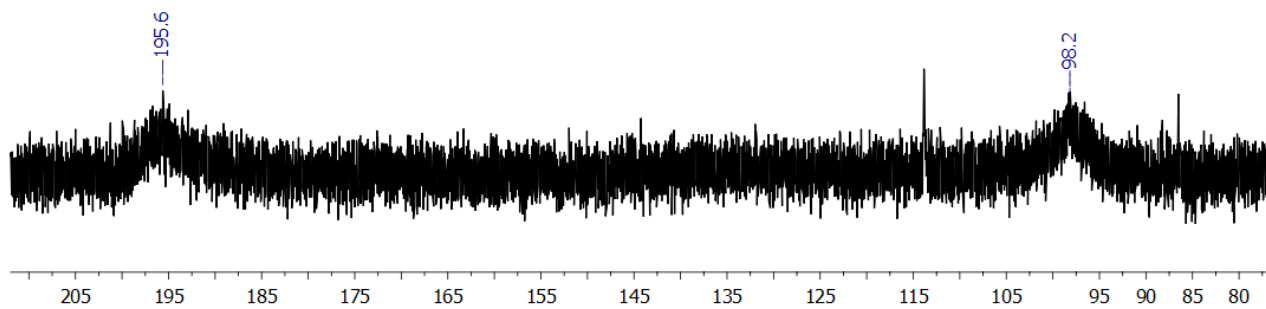

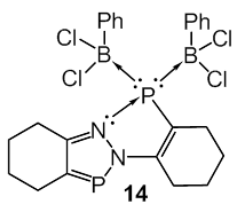

(<sup>31</sup>P{<sup>1</sup>H} NMR, 162 MHz, 233 K, CD<sub>2</sub>Cl<sub>2</sub>)

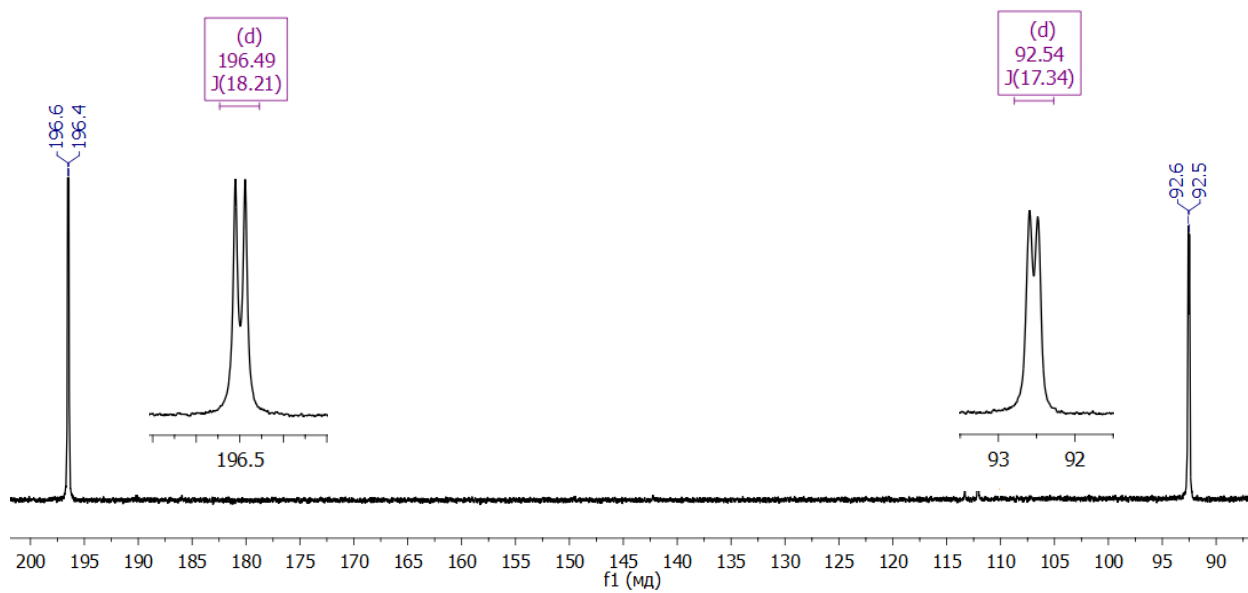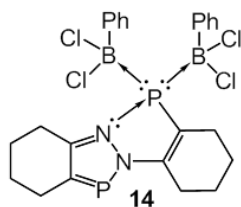

(<sup>11</sup>B{<sup>1</sup>H} NMR, 128 MHz, 293 K, CD<sub>2</sub>Cl<sub>2</sub>)

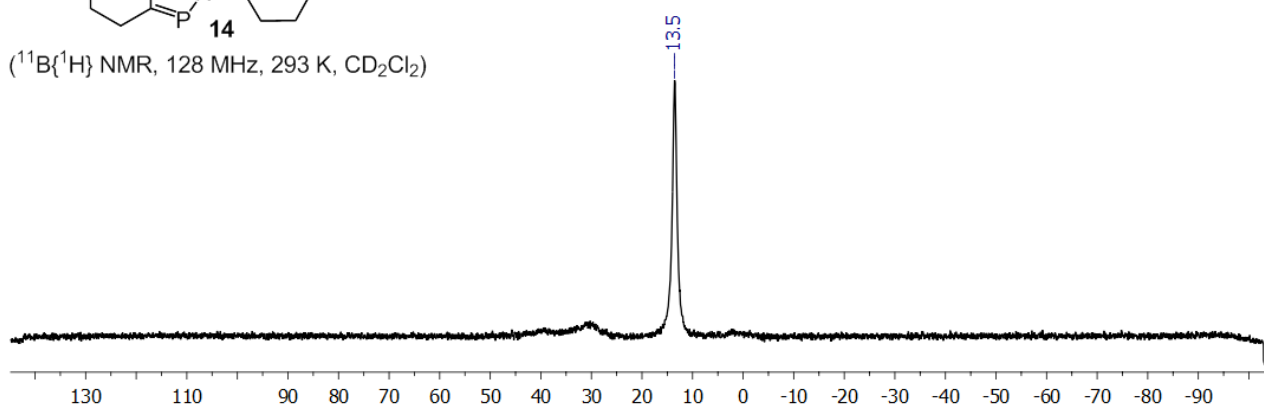

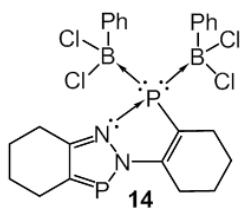

( $^{11}\text{B}\{^1\text{H}\}$  NMR, 128 MHz, 233 K,  $\text{CD}_2\text{Cl}_2$ )

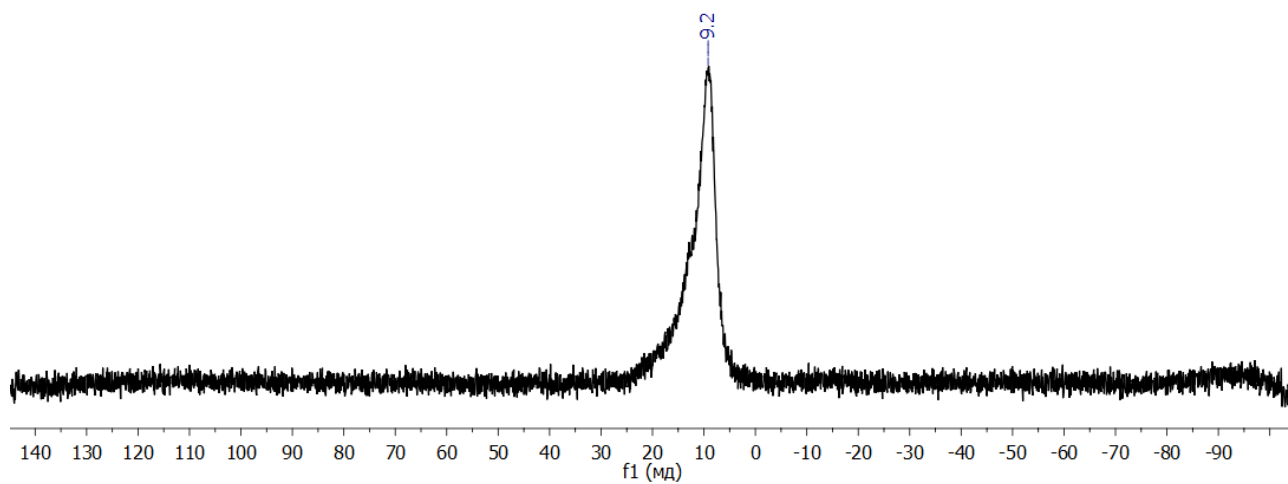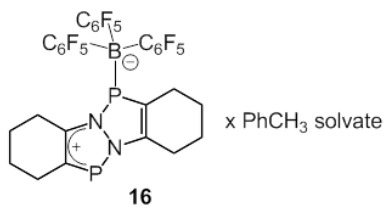

( $^1\text{H}$  NMR, 400 MHz, 253 K,  $\text{CD}_2\text{Cl}_2$ )

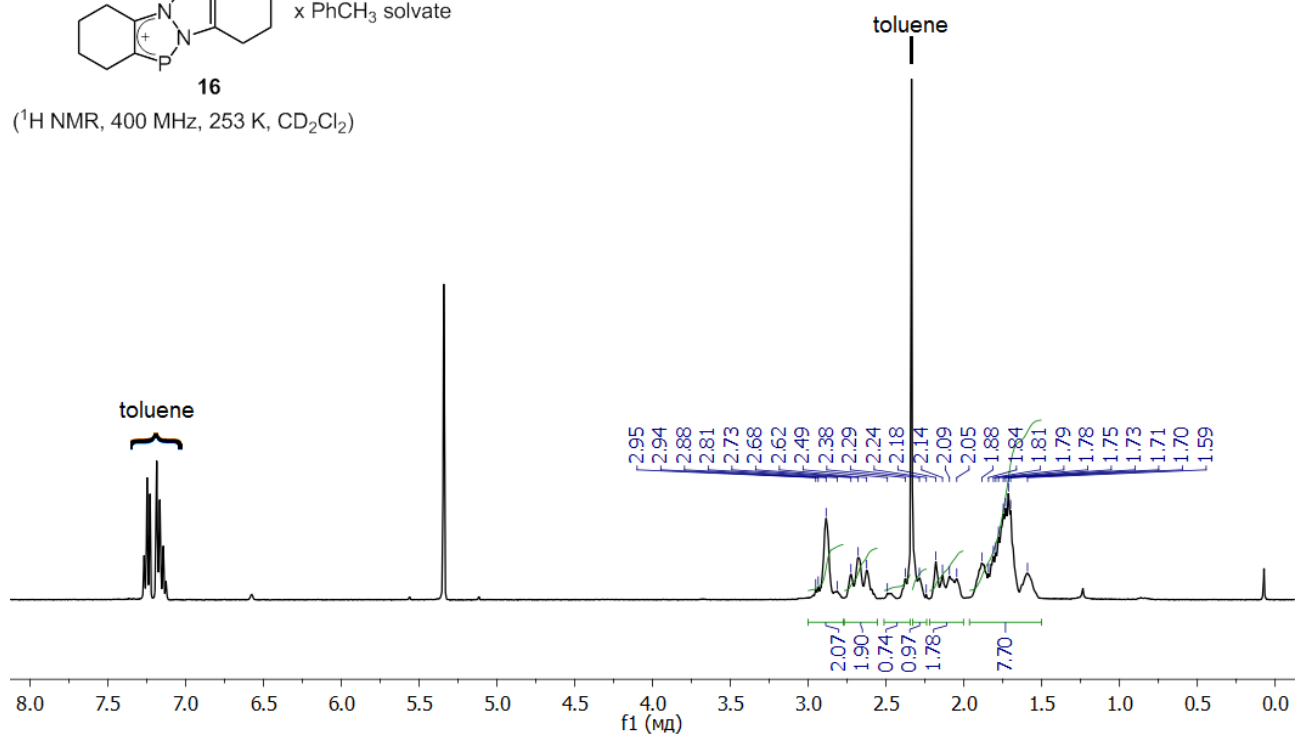

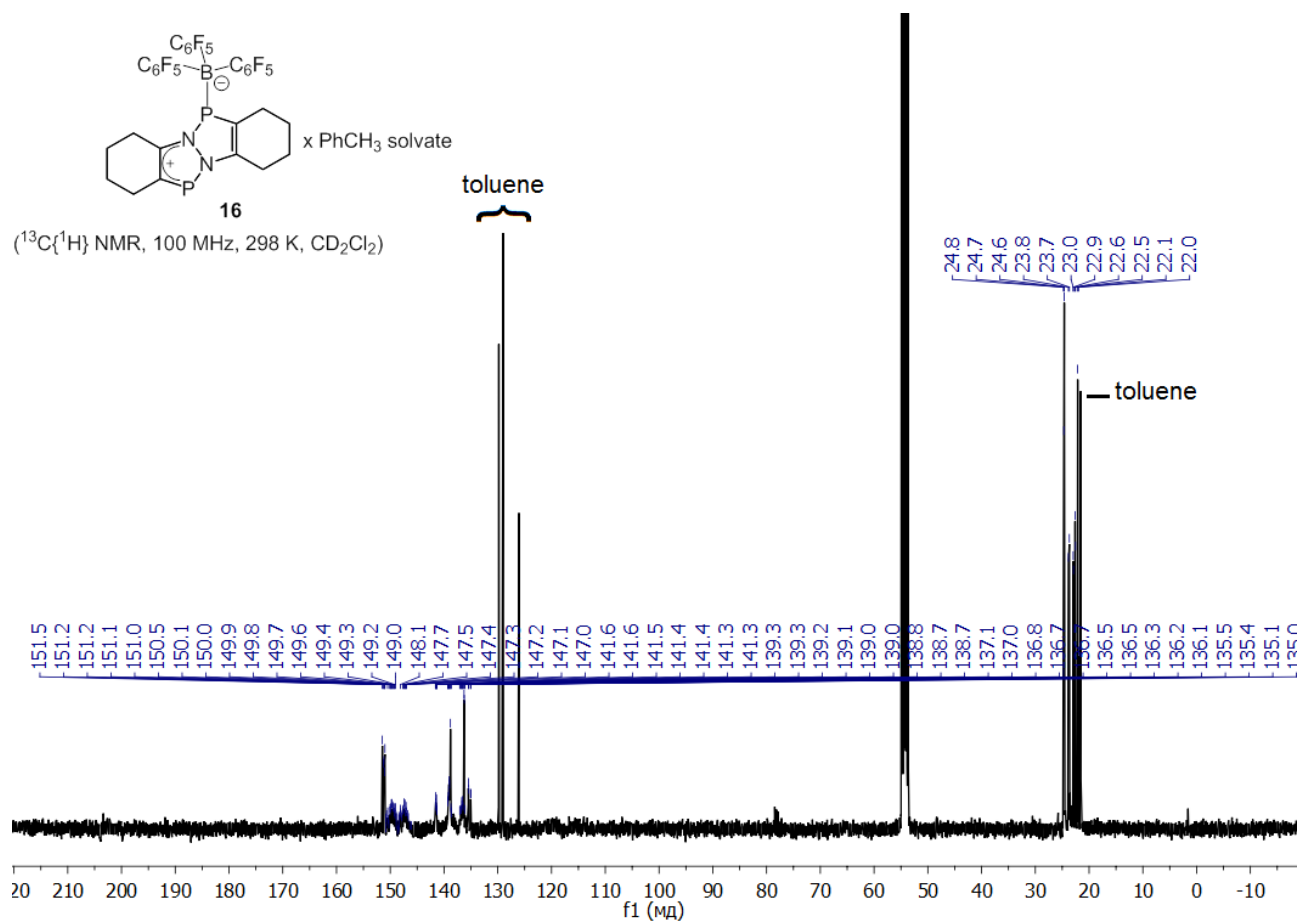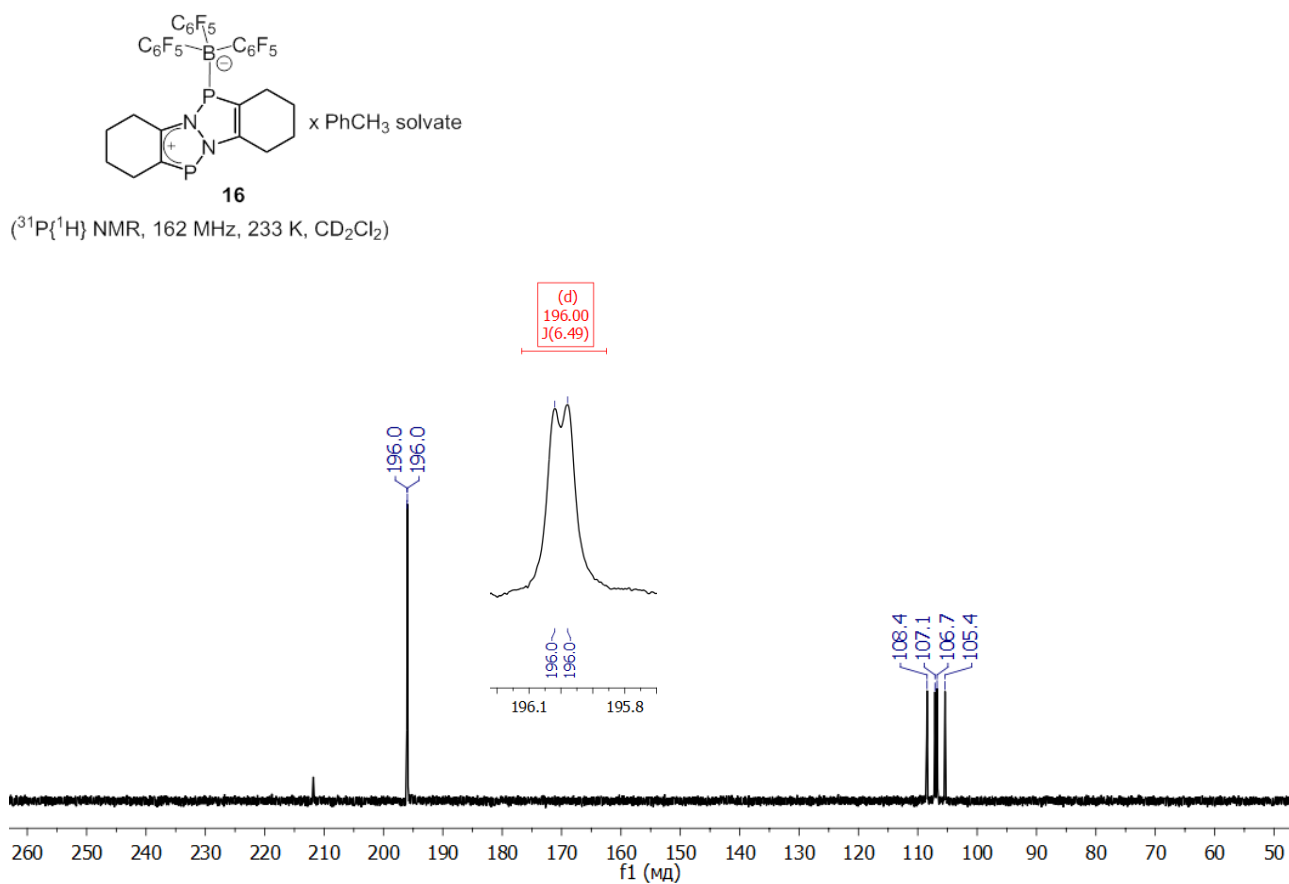

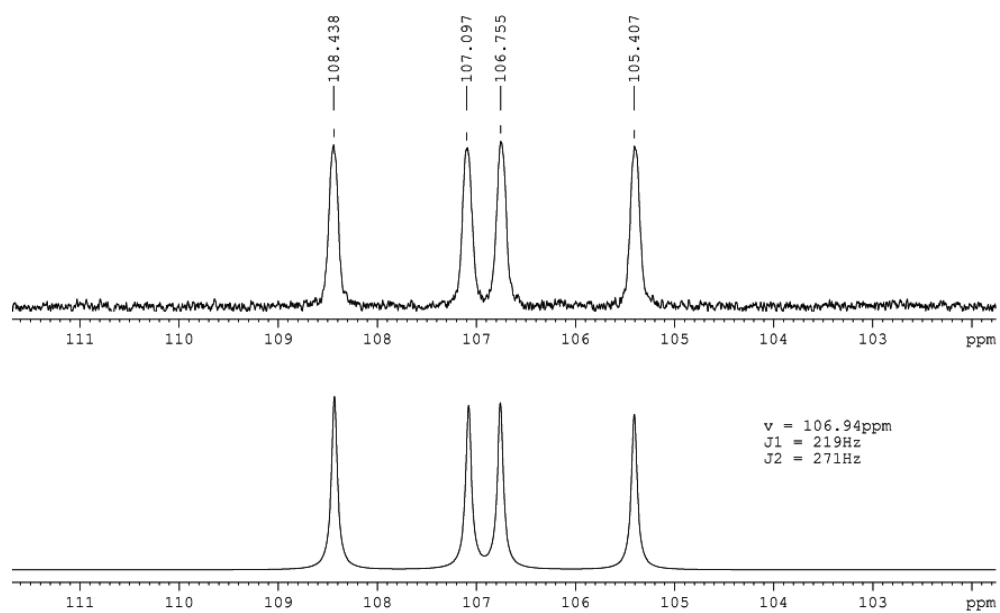

Fragment of the  $^{31}\text{P}\{^1\text{H}\}$  NMR spectrum of compound **16** and simulated spectrum.

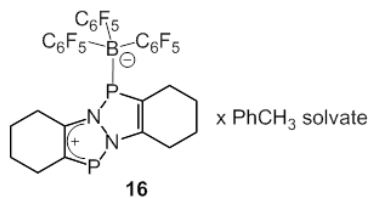

( $^{11}\text{B}\{^1\text{H}\}$  NMR, 128 MHz, 253 K,  $\text{CD}_2\text{Cl}_2$ )

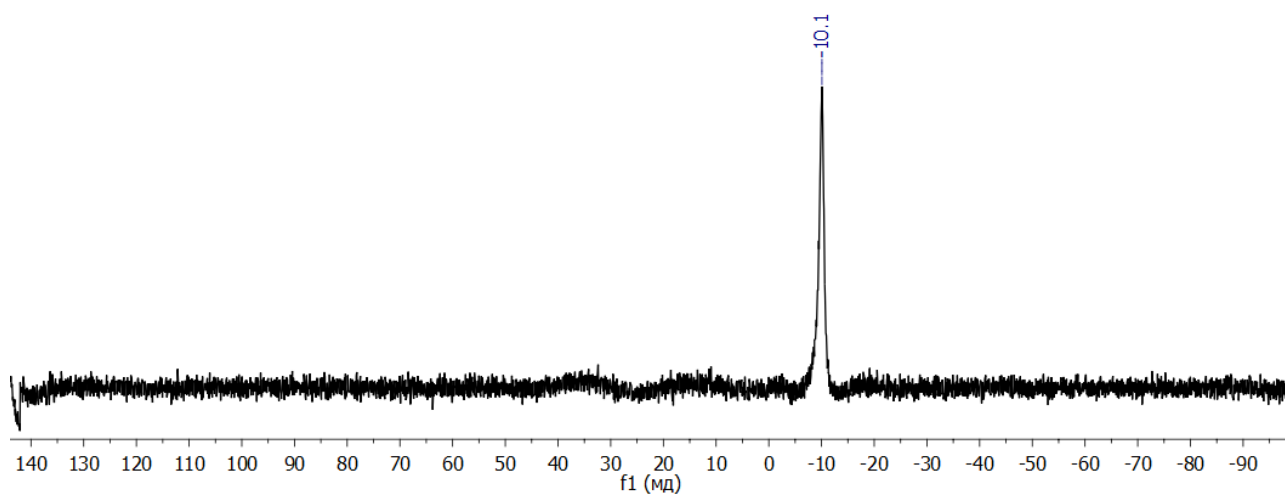

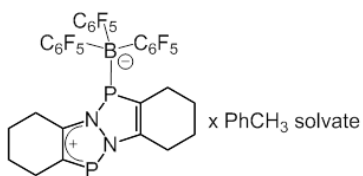

(<sup>19</sup>F{<sup>1</sup>H} NMR, 376 MHz, 253 K, CD<sub>2</sub>Cl<sub>2</sub>)

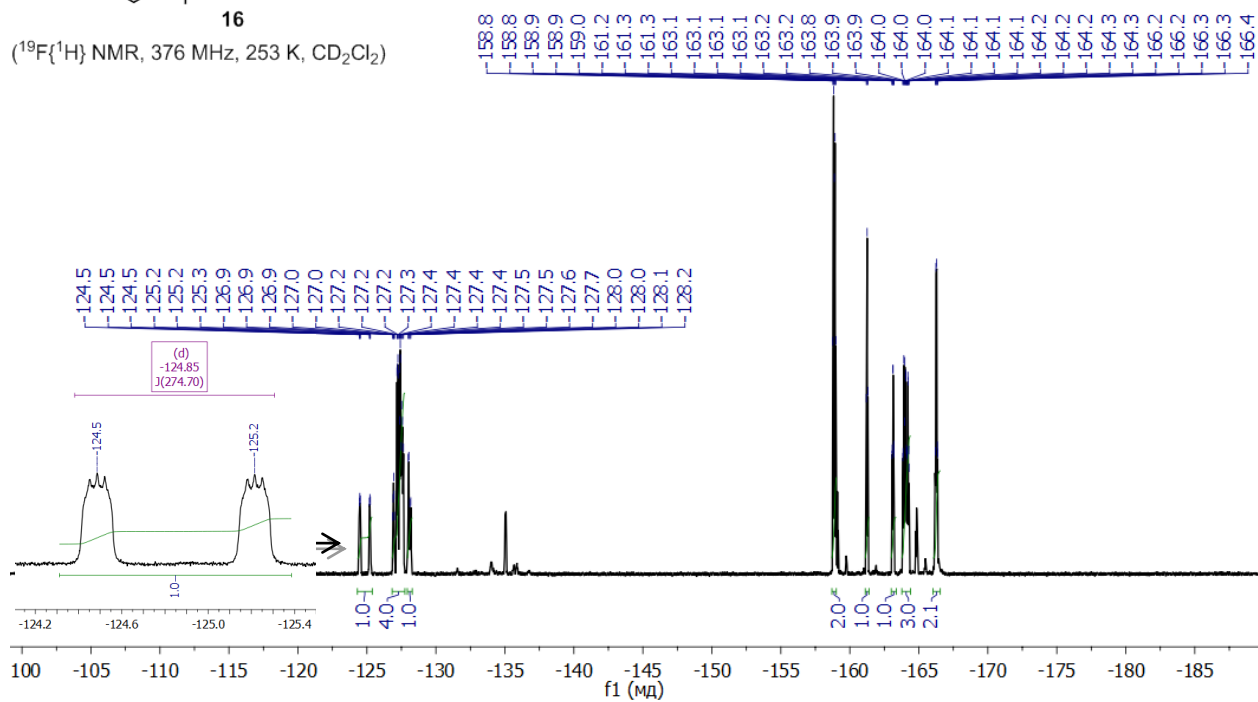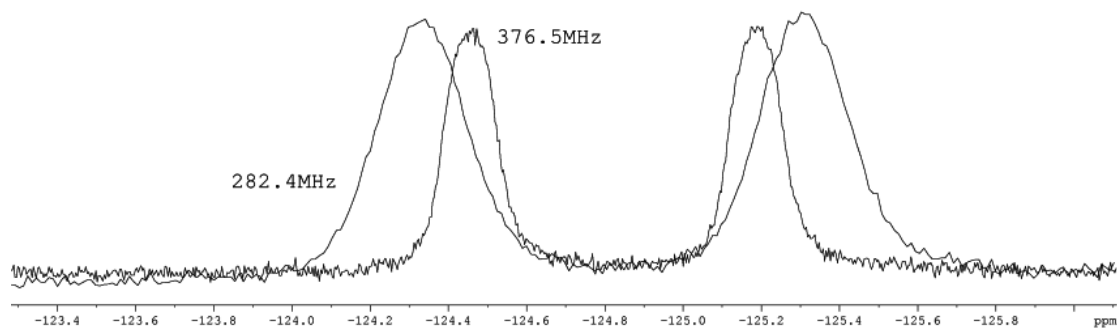

The fragment of <sup>19</sup>F NMR spectrum of compound **16** measured at 376.5 MHz (Bruker Avance 400) and 282.4 MHz (Bruker Avance 300) (293K) with the same ppm scale.

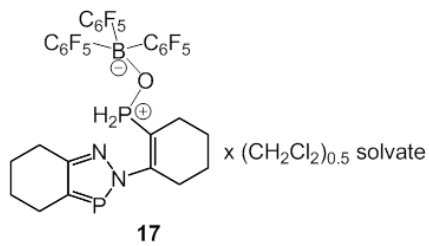

(<sup>1</sup>H NMR, 400 MHz, 293 K, toluene-*d*<sub>8</sub>)

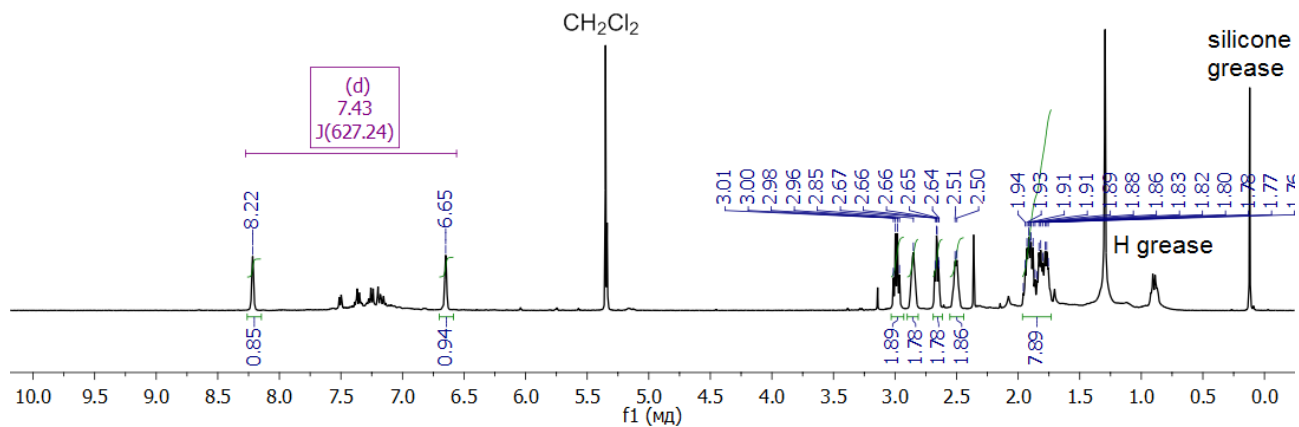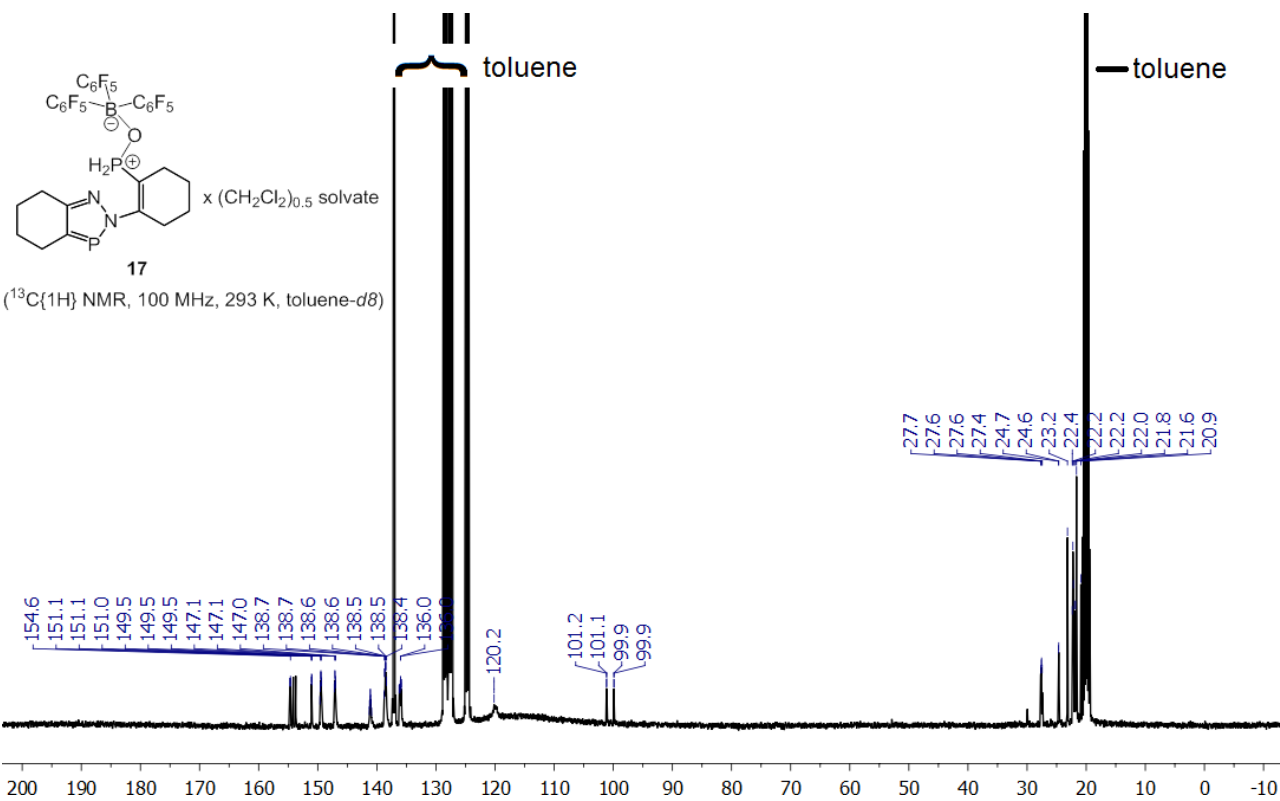

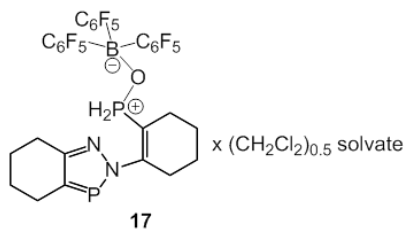

(<sup>31</sup>P{<sup>1</sup>H} NMR, 162 MHz, 293 K, toluene-*d*<sub>8</sub>)

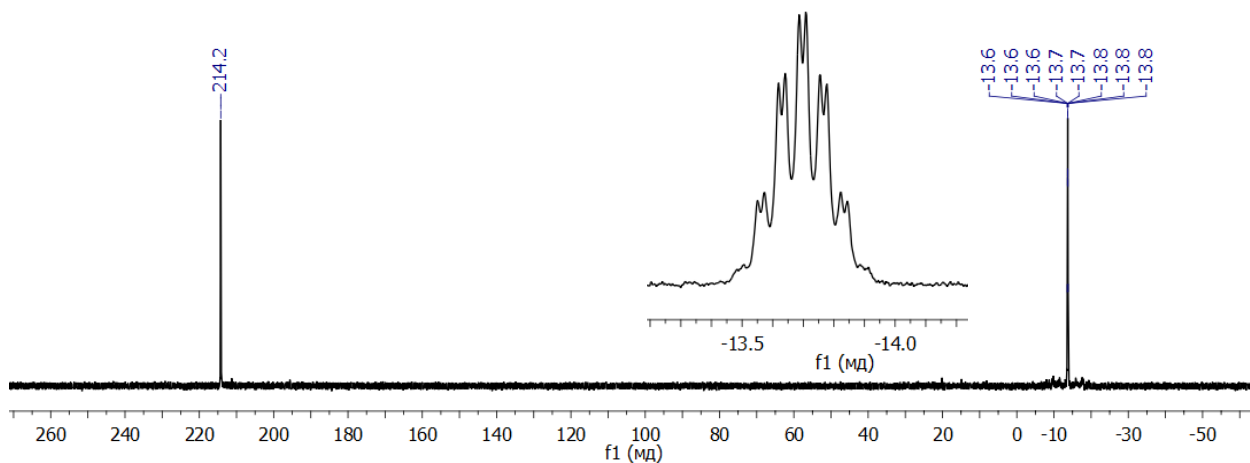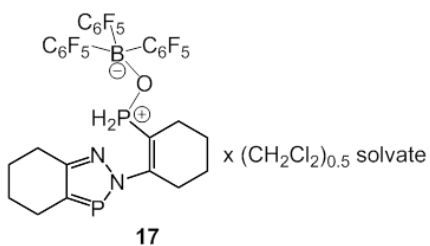

(<sup>31</sup>P NMR, 162 MHz, 293 K, toluene-*d*<sub>8</sub>)

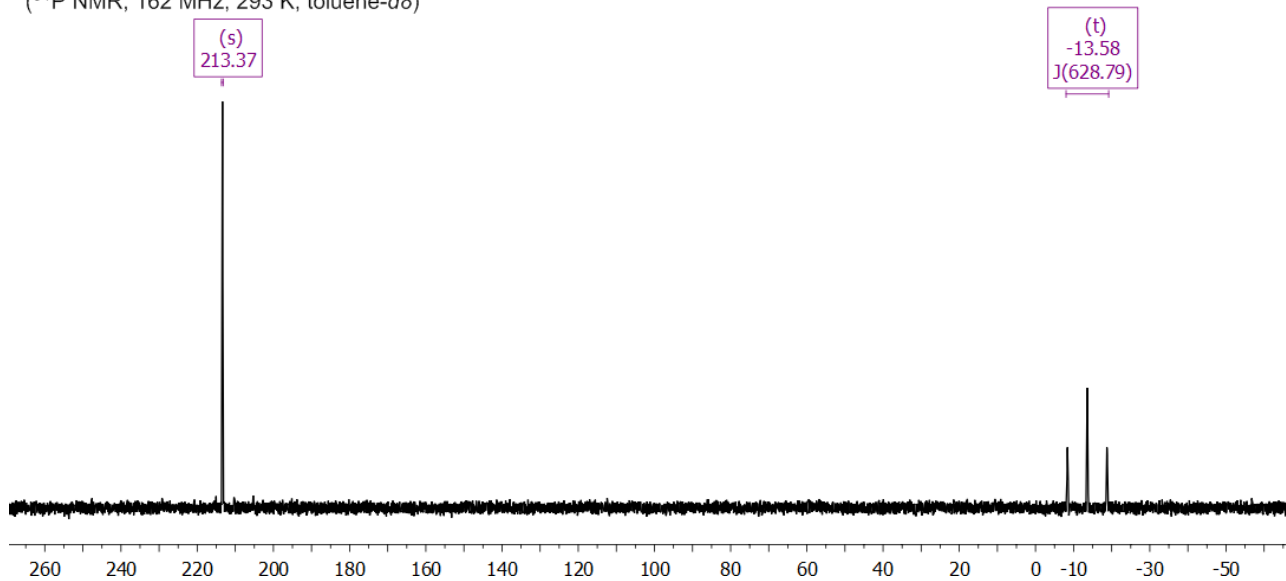



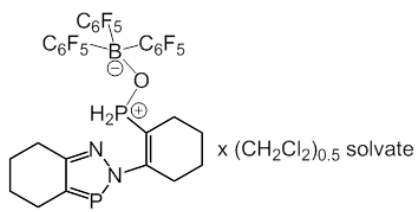

(<sup>11</sup>B{<sup>1</sup>H} NMR, 128 MHz, 293 K, toluene-*d*<sub>8</sub>)

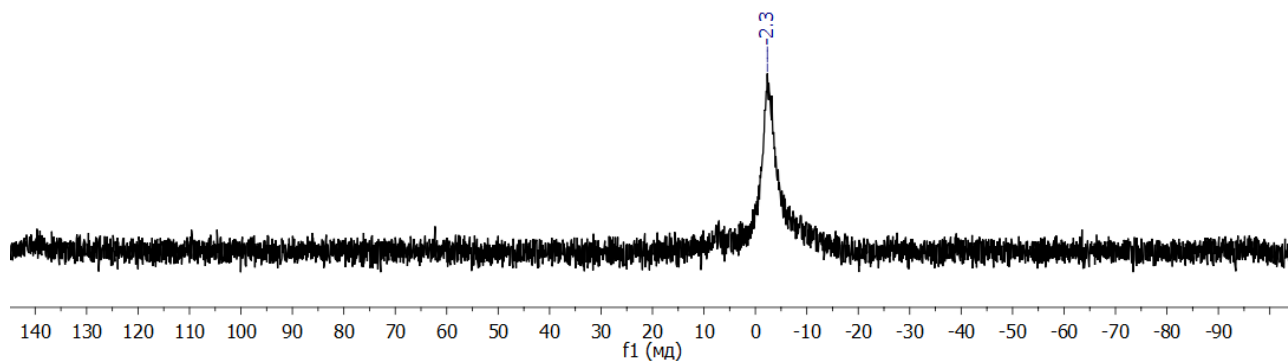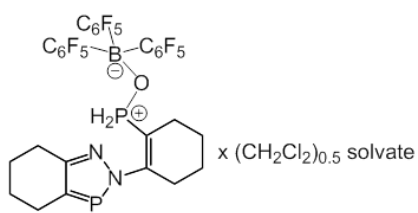

(<sup>19</sup>F{<sup>1</sup>H} NMR, 376 MHz, 293 K, toluene-*d*<sub>8</sub>)

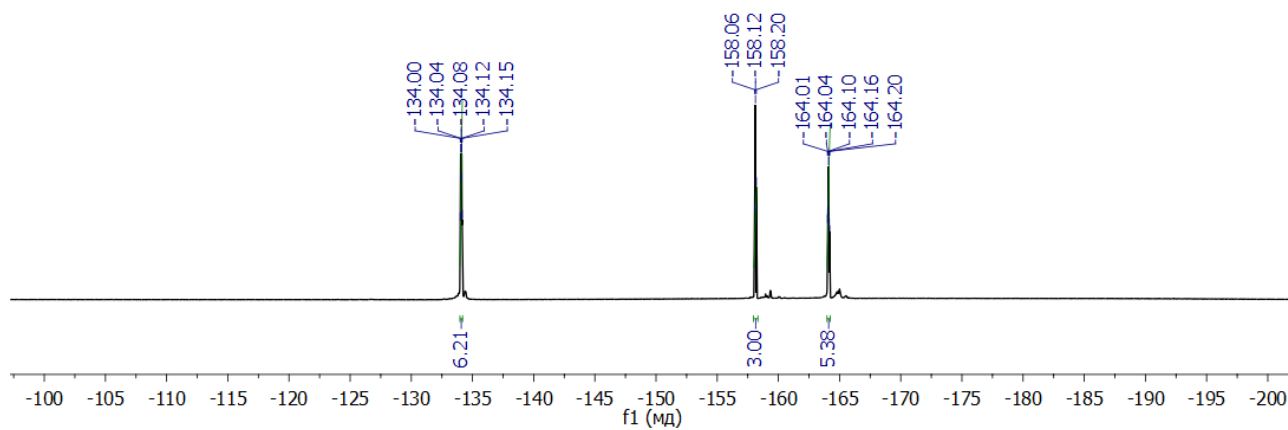

Supplement: d1dt00747e1.pdf [file d1dt00747e1.pdf]
